# Supplementary material for: Control of respiratory drive by extracorporeal CO2 removal in acute exacerbation of COPD breathing on non-invasive NAVA
Source: Springer Nature journal article supplement (doi:10.1186/s13054-019-2404-y), 2019-04-23

Supplemental Figure 2

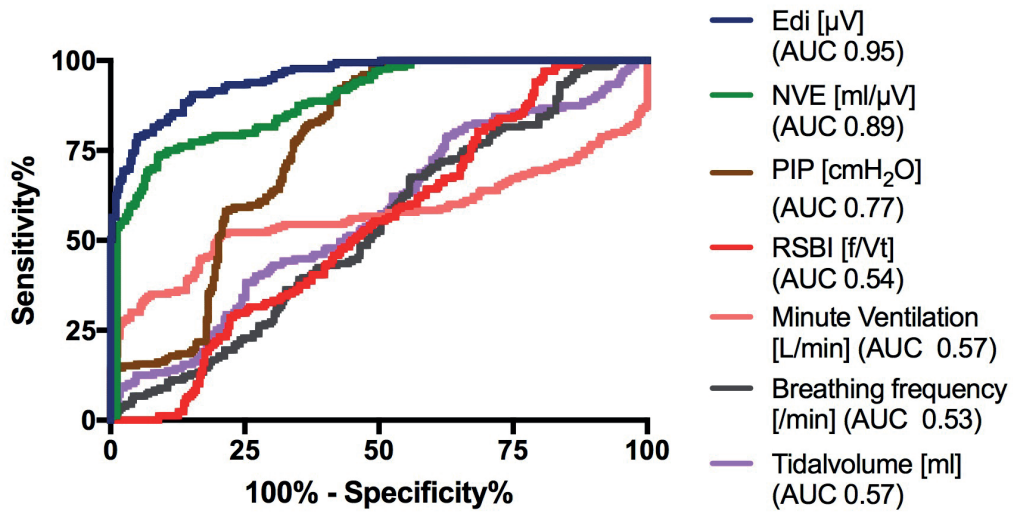

Supplement: MOESM4 [file 16669962]
